# Supplementary material for: Neuromuscular Monitoring, Muscle Relaxant Use, and Reversal at a Tertiary Teaching Hospital 2.5 Years after Introduction of Sugammadex: Changes in Opinions and Clinical Practice
Source: Anesthesiol Res Pract. 2015 Jan 22;2015:367937. doi: 10.1155/2015/367937 (PMC4312631; doi:10.1155/2015/367937)
Supplement: Supplementary file 1 — Full survey sent to anesthesiologists via a link to the Survey Monkey website [file 367937.f1.pdf]

**\*1. How many years of Anaesthesia training have you undertaken?**

- ☐ 1
- ☐ 2
- ☐ 3
- ☐ 4
- ☐ 5
- ☐ >5
- ☐ Consultant < 5yrs
- ☐ Consultant 5-10yrs
- ☐ Consultant > 10yrs

**\*2. When did you first start using Sugammadex "routinely" (not just in emergency scenarios)?**

- ☐ 2010
- ☐ 2011
- ☐ 2012
- ☐ I don't routinely use Sugammadex

**\*3. Do you always reverse Non Depolarising Neuromuscular Blocking Agents (NMBA)?**

- ☐ Yes always
- ☐ Not always

**\*4. Do you reverse NMBA more often since introduction of sugammadex at RPH?**

- ☐ Yes, I reverse more often
- ☐ No, I use less reversal
- ☐ About the same

## Sugammadex - 2.5 Years On

**\*5. After NMBA use, how often do you use reversal agents (neostigmine or sugammadex)?**

- ☐ 0%
- ☐ 1-25%
- ☐ 26-50%
- ☐ 51-75%
- ☐ 76-100%

**\*6. Which of the following factors help you in making the decision to administer reversal? Check all that apply**

- ☐ Type of NMBA
- ☐ Total dose of NMBA
- ☐ Timing of the last NMBA dose
- ☐ Qualitative neuromuscular monitoring (conventional nerve stimulator)
- ☐ Quantitative neuromuscular monitoring (numeric assesment TOF ratio)
- ☐ Clinical evidence
- ☐ Other (please specify)

**\*7. In your personal clinical practice, which of the following factors is the single most important in making the decision to administer reversal?**

- ☐ Type of NMBA
- ☐ Total dose of NMBA
- ☐ Timing of the last NMBA dose
- ☐ Qualitative neuromuscular monitoring (conventional nerve stimulator)
- ☐ Quantitative neuromuscular monitoring (numeric assesment TOF ratio)
- ☐ Clinical evidence
- ☐ Other (please specify)

## Sugammadex - 2.5 Years On

**\*8. If administering a reversal agent, please specify the percentage use of Sugammadex**

- ☐ 0%
- ☐ 1-25%
- ☐ 26-50%
- ☐ 51-75%
- ☐ 76-99%
- ☐ 100%

**\*9. Based on your clinical experience at RPH, what subgroups of patients are best suited for reversal with Sugammadex?**

**10. Do you use NMBA more often since unrestricted introduction of Sugammadex at RPH?**

- ☐ Yes, to optimise Anaesthesia
- ☐ Yes, to optimise Surgery
- ☐ No, my practice has not changed
- ☐ No, I use less NMBA

**11. Has your choice of NMBA changed since unrestricted introduction of Sugammadex at RPH?**

- ☐ Yes I use more Aminosteroidal NMBA
- ☐ No
- ☐ Other (please specify)

**\*12. Intraoperatively, do you paralyze patients deeper or for longer since unrestricted introduction of Sugammadex at RPH?**

- ☐ Yes
- ☐ No

## Sugammadex - 2.5 Years On

### 13. Do you believe that deeper neuromuscular paralysis may be a way to safely improve surgical conditions with the chance to reduce the use of volatiles/opioids (depth of anaesthesia monitoring assumed)?

- ☐ Yes, I believe deeper paralysis may improve surgical conditions and patient outcome (no need for too deep and potentially detrimental [e.g. BIS < 40] anaesthetic; faster recovery).
- ☐ No, I do not believe that deep paralysis can safely achieve better surgical conditions and/or improved patient outcome.

### \*14. As you see potential benefits of deep paralysis: Is this your own clinical practice?

- ☐ Yes, I do practice the concept of deep paralysis
- ☐ No, although I see a hypothetical benefit, I do not practice the concept of deep paralysis

### \*15. Have you personally experienced any of the following since unrestricted introduction of sugammadex at RPH (check all that apply)?

- ☐ Faster patient turnover
- ☐ Less PONV in recovery
- ☐ Surgeons more satisfied with anaesthesia
- ☐ Anaesthetist more satisfied with anaesthesia
- ☐ Faster surgery
- ☐ Lower incidence of residual paralysis
- ☐ Patient outcome improved in recovery (better oxygen saturation, patient "more awake")
- ☐ Sugammadex related side effects (-please specify in 'Other')
- ☐ Problems with re-intubation of patient after use of sugammadex (aminosteroid NMBA no longer usable)
- ☐ Other (please specify)

### \*16. Do you use a higher dose of NMBA for the purpose of a 'modified RSI' since unrestricted introduction of Sugammadex at RPH?

- ☐ Yes, for Rocuronium
- ☐ Yes, for Vecuronium
- ☐ Yes, for both Vecuronium and Rocuronium
- ☐ No

If YES, dose (mg/kg) of what NMBA?

## Sugammadex - 2.5 Years On

**\*17. Do you consider Suxamethonium a 'superseded' drug since unrestricted introduction of Sugammadex at RPH?**

- ☐ Yes
- ☐ No

**\*18. When using sugammadex at the end of anaesthesia: Do you frequently (ie > 25%) use more than a 200 mg vial per patient?**

- ☐ No
- ☐ > 25% of cases
- ☐ > 50% of cases
- ☐ > 75% of cases

**\*19. Have you ever used a 16mg/kg dose of Sugammadex?**

- ☐ Yes
- ☐ No

If YES, how many times?

**\*20. In your view, at what Train of Four count would 2mg/kg Sugammadex produce rapid and reliable reversal of aminosteroidal NMBA?**

- ☐ 0/4
- ☐ 1/4
- ☐ 2/4
- ☐ 3/4
- ☐ 4/4
- ☐ Any Response

**\*21. Do you routinely use a nerve stimulator prior to administration of Sugammadex?**

- ☐ Yes
- ☐ No

**\*22. Do you routinely check the success of NMBA reversal after administration of sugammadex?**

- ☐ No, sugammadex is so reliable that in my clinical routine monitoring is redundant
- ☐ yes, I always monitor the success of NMBA reversal prior to extubation

## Sugammadex - 2.5 Years On

**\*23. How much time do you allow from time of administration of Sugammadex to extubation?**

- ☐ <1min
- ☐ 1-3min
- ☐ 3-5min
- ☐ 5-10min
- ☐ I don't take notice of the time as it is not clinically significant

**\*24. Do you know the cost of Sugammadex to the RPH Anaesthesia department?**

- ☐ Yes, and this is an important consideration in my usage of reversal agents
- ☐ Yes, but this is not an important consideration in my usage of reversal agents
- ☐ I do not know the cost

**\*25. After your experience with sugammadex at RPH - do you feel that you are able to practice anaesthesia as safely (in patients requiring muscle relaxation) at hospitals which do not provide unrestricted use of sugammadex?**

- ☐ Yes, no problem! Neostigmine is as safe as sugammadex.
- ☐ Yes, no problem! Timing is as safe as sugammadex.
- ☐ No, I feel that my anaesthetic is impaired if my access to sugammadex is hindered.
- ☐ No, I would refuse working at such hospital or demand access to sugammadex.

**26. Please indicate why you feel less safe without access to sugammadex.**
